# Supplementary material for: Interface properties of hydroxyapatite in ternary composites cathodes for electromethanogenesis
Source: Royal Society of Chemistry journal article supplement (doi:10.1039/d4nj01053a), 2024-01-01
Supplement: d4nj01053a1.pdf [file d4nj01053a1.pdf]

## Supplementary materials

### Interface Properties of Hydroxyapatite in Ternary Composites

### Cathodes for Electromethanogenesis

Michele Bigica<sup>1</sup>, Giorgia Ghiara<sup>2</sup>, Pierangela Cristiani<sup>3,\*</sup>, Sebastiano Campisi<sup>1,\*</sup>, Antonella Gervasini<sup>1</sup>

<sup>1</sup> Università degli Studi di Milano, Dipartimento di Chimica, 20133 Milano, Italy;

<sup>2</sup> Università degli Studi di Milano, Dipartimento di Scienze e Politiche Ambientali, 20133 Milano, Italy;

<sup>3</sup> Ricerca sul Sistema Energetico - RSE S.p.A., 20134 Milano, Italy

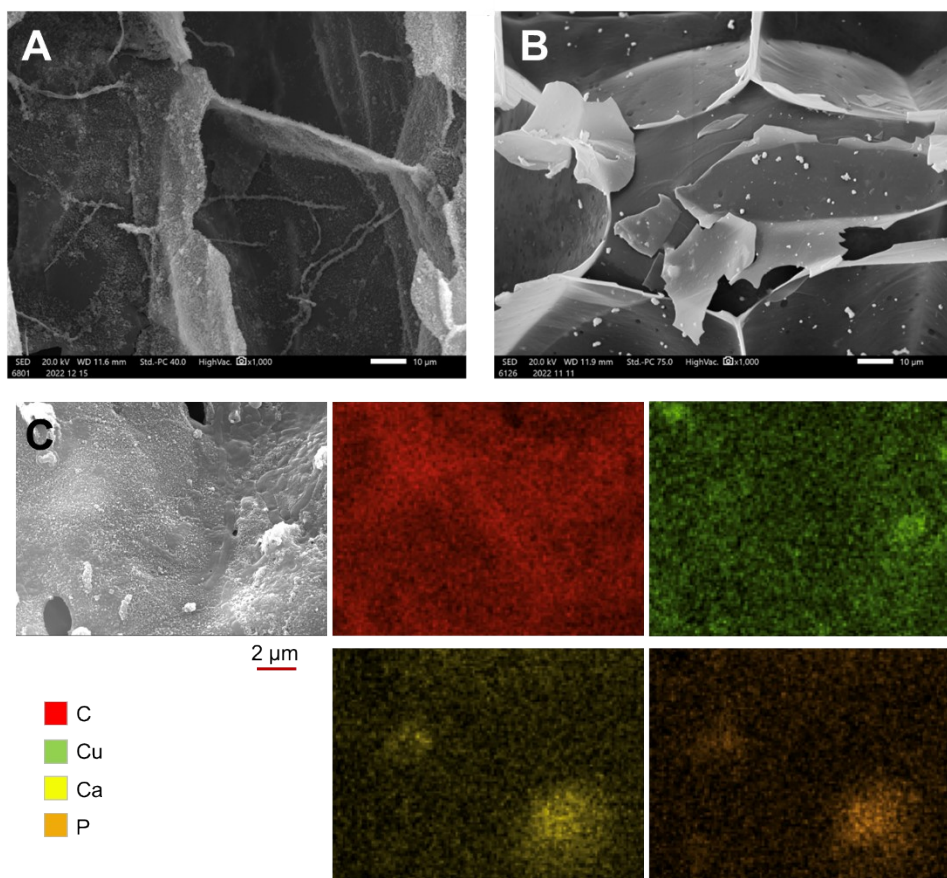

**Figure S.1** SEM micrographs of colonized external section (a) and uncolonized internal section (b) of 10HAP-20Cu/C surface and EDS mapping (c).

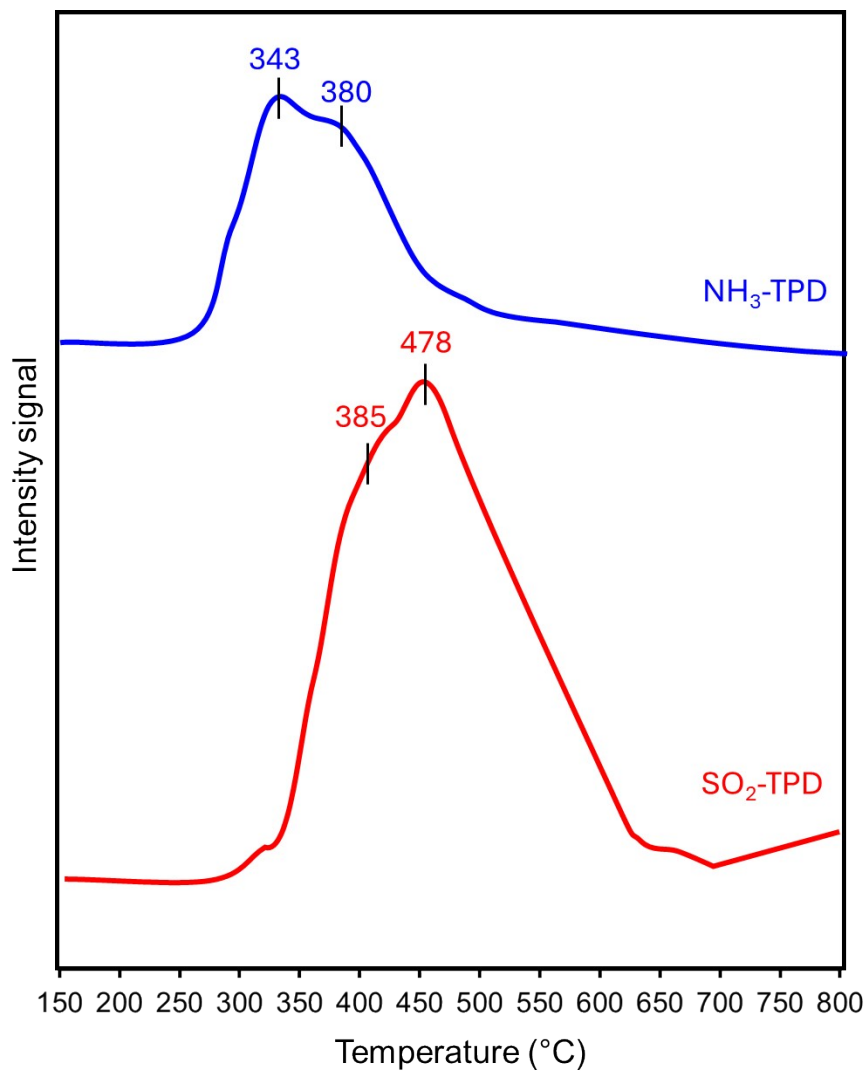

**Figure S.2** NH<sub>3</sub>-TPD and SO<sub>2</sub>-TPD profiles on hydroxyapatite (desorption data acquired in the isothermal step at 150°C are not shown)

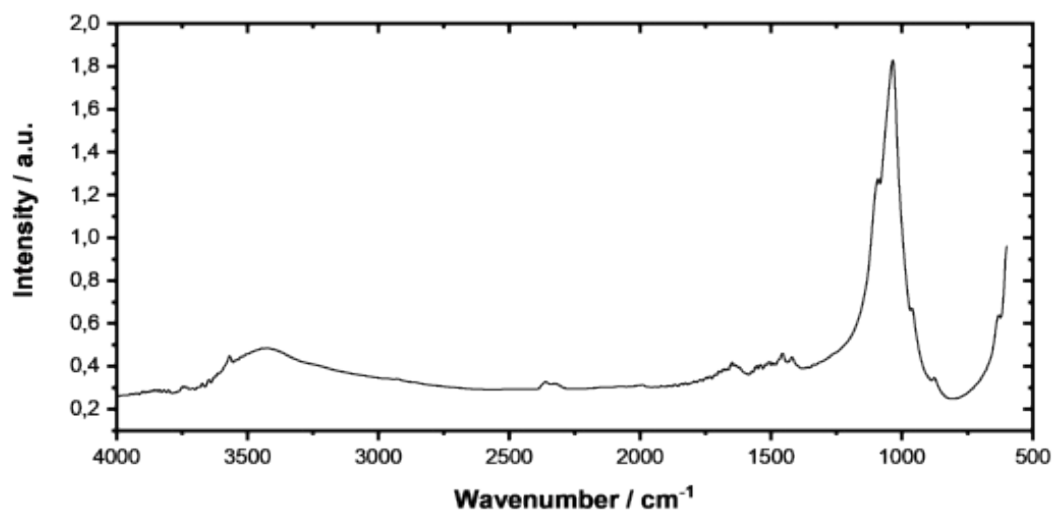

**Figure S.3** FT-IR spectrum of HAP in the 500-4000 cm<sup>-1</sup> region

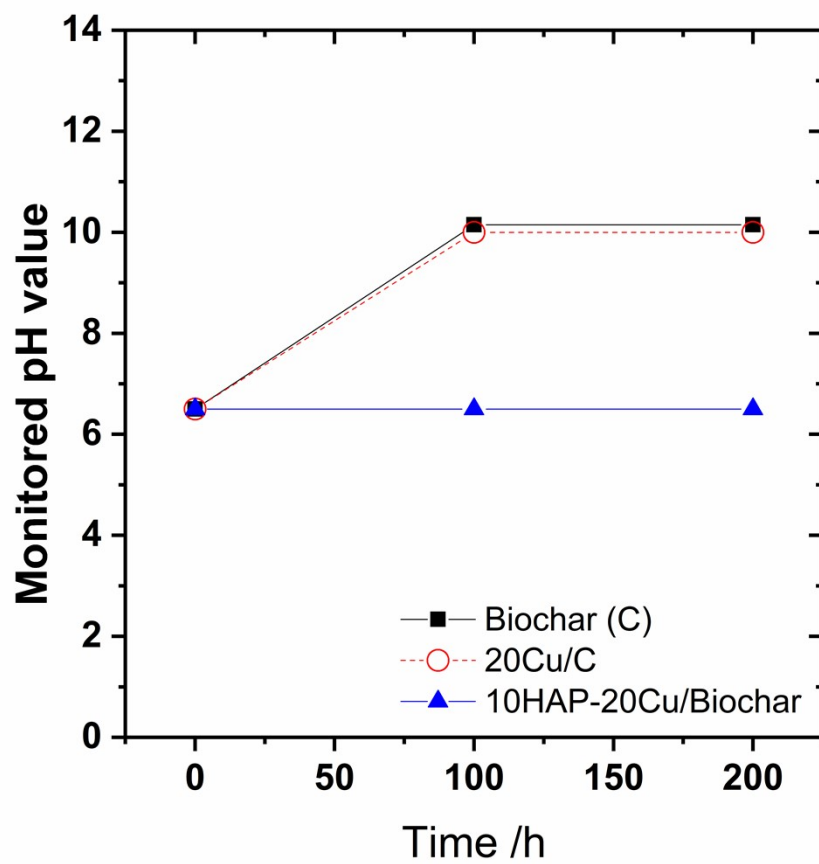

**Figure S.4** Plots of periodically monitored pH values in the cathodic chamber vs. time for biochar (black line), 20Cu/C (red line) and 10HAP-20Cu/C (blue line).

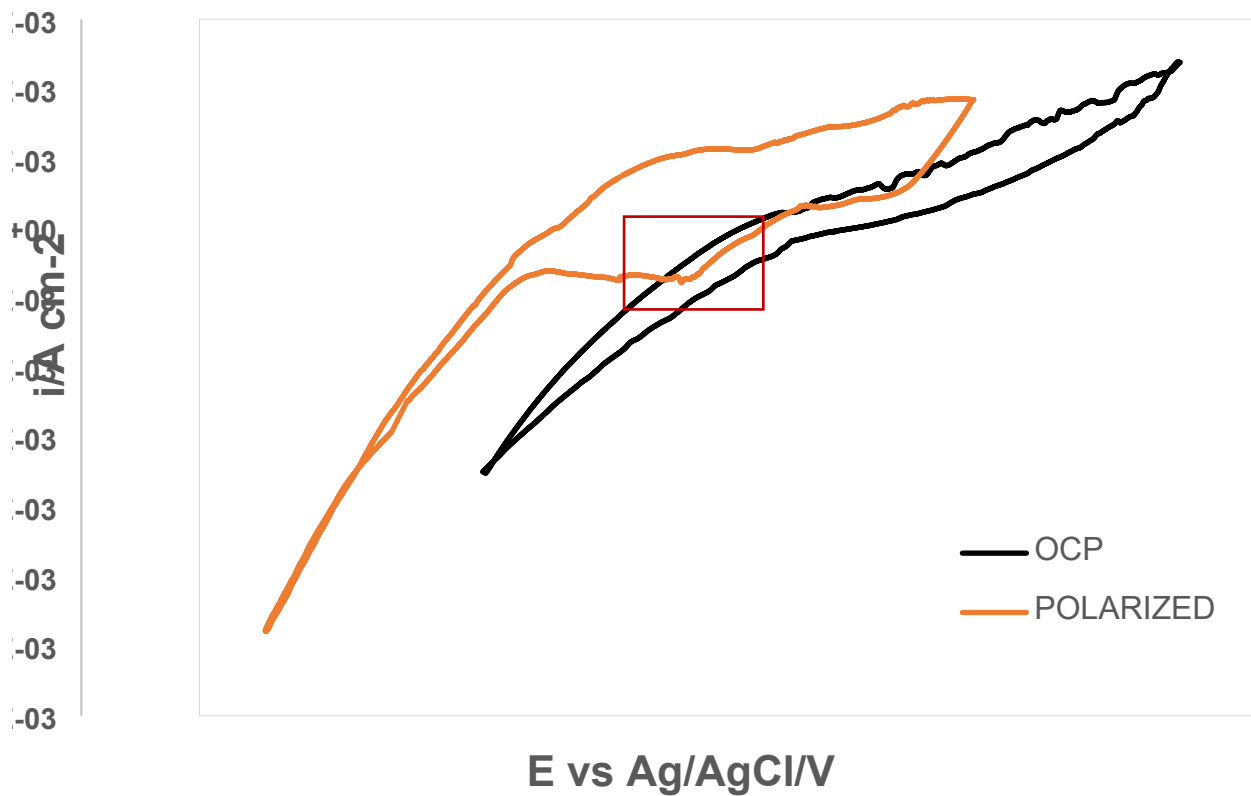

**Figure S.5.** Cyclic voltammograms from  $-1.5$  vs OCP to  $1.5$  vs OCP at  $50 \text{ mV s}^{-1}$  of the composites (OCP and POLARIZATION) at 14 days of immersion.
